# Supplementary material
Source: Elsevier journal article supplement (https://www.sciencedirect.com/science/article/pii/S2173574320301398)
Supplement: mmc1 [file S2173574320301398:mmc1.pdf]

## **ANEXO 1: Cuestionarios realizados por el centro de llamadas para el cribado por síntomas:**

### **A) De artrosis de columna cervical:**

1. ¿Tiene o ha tenido dolor de cuello/cervicales (*dolor en la nuca, en la parte de atrás del cuello*) sin que haya sido por una caída / golpe o sobreesfuerzo?

1. Sí 0. No

*Si respuesta afirmativa, continuar preguntando:*

2. ¿Ha durado ese dolor 3 o más meses seguidos, aunque el dolor no sea fijo / tenga altibajos?

1. Sí 0. No

*Si respuesta afirmativa, continuar preguntando:*

3. ¿Empeora al mover el cuello o girar la cabeza?

1. Sí 0. No

Estas preguntas de cribado sólo se realizaron a los sujetos  $\geq 40$  años. Se consideró positivo si el individuo contestaba afirmativamente a las 3 preguntas.

### **B) De artrosis de columna lumbar:**

1. ¿Tiene o ha tenido dolor de la parte baja de la espalda/cintura/espalda a la altura de los riñones/lumbares (*es el dolor de lumbago o lumbalgia*) sin que haya sido por una caída / golpe o sobreesfuerzo?

1. Sí

0. No

*Si respuesta afirmativa, continuar preguntando:*

2. ¿Ha durado ese dolor 3 o más meses seguidos, aunque el dolor no sea fijo / tenga altibajos?

1. Sí 0. No

*Si respuesta afirmativa, continuar preguntando:*

3. ¿Empeora al coger peso o hacer esfuerzos?

1. Sí 0. No

Se consideró positivo si un individuo  $\geq 40$  años contestaba afirmativamente a las 3 preguntas.

B) De artrosis periférica:

1. ¿Tiene o ha tenido dolor en alguna articulación sin que haya sido por una caída / golpe o un sobreesfuerzo? 1. Sí 0. No

*Si la respuesta a la primera pregunta es afirmativa, continuar preguntando:*

2. ¿Durante más de 4 semanas seguidas? 1. Sí 0. No

*Si la respuesta a la segunda pregunta es afirmativa, continuar preguntando:*

3. ¿Alguna vez ha tenido inflamación o hinchazón de alguna de esas articulaciones con dolor durante más de 4 semanas seguidas? 1. Sí 0. No
4. Sin que haya sido por una caída/golpe o un sobreesfuerzo, ¿en cuál/es de las siguientes articulaciones ha tenido ese dolor durante más de 4 semanas seguidas?

- a. Localización del dolor en manos ☐ Sí ☐ No
- b. Lateralidad manos ☐ Derecha ☐ Izquierda ☐ Ambas
- c. Localización del dolor en caderas/ingles ☐ Sí ☐ No
- d. Lateralidad caderas ☐ Derecha ☐ Izquierda ☐ Ambas
- e. Localización del dolor en rodillas ☐ Sí ☐ No
- f. Lateralidad rodillas ☐ Derecha ☐ Izquierda ☐ Ambas
- g. Localización del dolor en tobillos ☐ Sí ☐ No
- h. Lateralidad tobillos ☐ Derecha ☐ Izquierda ☐ Ambas
- i. Localización del dolor en pies ☐ Sí ☐ No
- j. Lateralidad pies ☐ Derecha ☐ Izquierda ☐ Ambas

5. El dolor de cadera/ingle:

- a. ¿Empeora con el esfuerzo, al caminar o al subir/bajar escaleras? 1. Sí 0. No

b. ¿Mejora con la actividad física/el ejercicio (*tiene el dolor pero después de que está un rato moviéndose, se le alivia*)? 1. Sí 0. No

c. ¿Mejora con el reposo? 1. Sí 0. No

6. El dolor de rodilla:

a. ¿Empeora con el esfuerzo, al caminar o al subir/bajar escaleras?

1. Sí 0. No

b. ¿Mejora con la actividad física/el ejercicio (*tiene el dolor pero después de que está un rato moviéndose, se le alivia*)? 1. Sí 0. No

c. ¿Mejora con el reposo (*se encuentra mejor cuando está sentado o acostado*)? 1. Sí 0. No

7. El dolor de mano:

a. ¿Empeora al usar las manos/mover los dedos? 1. Sí 0. No

b. ¿Mejora al usar las manos/mover los dedos (*el dolor mejora después de un rato moviendo las manos*)? 1. Sí 0. No

c. ¿Mejora con el reposo (*mejora cuando tiene las manos quietas, sin hacer esfuerzos*)? 1. Sí 0. No

8. ¿Le ocurre que por la mañana no puede mover la zona afectada o la encuentra rígida? (*es decir, cuando se levanta por la mañana siente rigidez y le cuesta mover las articulaciones. Le cuesta caminar durante un rato si el dolor es en caderas, rodillas o pies, y si es en las manos, le cuesta cerrarlas al levantarse*)

1. Sí 0. No

*Si la respuesta a la pregunta 8 es afirmativa, continuar preguntando:*

9. ¿Durante más de media hora? 1. Sí 0. No

Se consideró positivo si un sujeto  $\geq 40$  años refería tener o haber tenido dolor en alguna de las 3 localizaciones, no debido a traumatismo o sobreesfuerzo, de más

de 4 semanas de duración, y que empeoraba con la actividad de la articulación afectada (respuesta afirmativa a la pregunta 5a, 6a o 7a).
