# Supplementary material
Source: Elsevier journal article supplement (https://www.sciencedirect.com/science/article/pii/S2173574320301398)
Supplement: mmc2 [file S2173574320301398:mmc2.pdf]

## **ANEXO 2: Cuestionario telefónico para estudio de la sospecha por parte del reumatólogo:**

### **A) De artrosis de columna cervical:**

1. De acuerdo con el cuestionario realizado en (*decir la fecha de la entrevista hecha por el call center*), tiene o ha tenido dolor en el cuello (o dolor cervical/de cervicales), sin que haya sido por un golpe/caída o sobreesfuerzo. ¿Es así?

☐ Sí ☐ No

*Si respuesta afirmativa a la pregunta 1, continuar preguntando:*

2. ¿Ha durado ese dolor 3 o más meses seguidos, aunque el dolor no sea fijo / tenga altibajos? ☐ Sí ☐ No

*Si respuesta afirmativa a la pregunta 2, continuar preguntando:*

3. ¿Empeora al mover el cuello o girar la cabeza? ☐ Sí ☐ No

*Si respuesta afirmativa a las preguntas 2 y 3, continuar preguntando:*

4. ¿Le han hecho una radiografía para estudiar ese dolor? ☐ Sí ☐ No

*Si respuesta afirmativa a la pregunta 4, continuar preguntando:*

5. ¿Recuerda el resultado de esa radiografía?

☐ Normal ☐ Con alteraciones ☐ No recuerda

*Teniendo en cuenta las respuestas anteriores:*

6. Resultado del cribado<sup>1</sup> ☐ Positivo ☐ Negativo

7. ¿Mantiene usted la sospecha de artrosis de columna cervical? ☐ Sí ☐ No

8. Motivo de la sospecha negativa (indicar en caso de que se decida no mantener la sospecha cuando el resultado del cribado de acuerdo a los criterios definidos por el comité científico es positivo):

### **B) De artrosis de columna lumbar:**

1. De acuerdo con el cuestionario realizado en (*decir la fecha de la entrevista hecha por el call center*), tiene o ha tenido dolor en la parte baja de la espalda/cintura/espalda a la altura de los riñones/en la zona lumbar/en las lumbares/lumbago o lumbalgia, sin que haya sido por un golpe/caída o sobreesfuerzo. ¿Es así? ☐ Sí ☐ No

*Si respuesta afirmativa a la pregunta 1, continuar preguntando:*

2. ¿Ha durado ese dolor 3 o más meses seguidos, aunque el dolor no sea fijo / tenga altibajos? ☐ Sí ☐ No

*Si respuesta afirmativa a la pregunta 2, continuar preguntando:*

3. ¿Empeora al coger peso o hacer esfuerzos? ☐ Sí ☐ No

*Si respuesta afirmativa a las preguntas 2 y 3, continuar preguntando:*

4. ¿Le han hecho una radiografía para estudiar ese dolor? ☐ Sí ☐ No

*Si respuesta afirmativa a la pregunta 4, continuar preguntando:*

5. ¿Recuerda el resultado de esa radiografía?

☐ Normal ☐ Con alteraciones ☐ No recuerda

*Teniendo en cuenta las respuestas anteriores:*

6. Resultado del cribado<sup>1</sup> ☐ Positivo ☐ Negativo

7. ¿Mantiene usted la sospecha de artrosis de columna lumbar? ☐ Sí ☐ No

8. Motivo de la sospecha negativa (indicar en caso de que se decida no mantener la sospecha cuando el resultado del cribado de acuerdo a los criterios definidos por el comité científico es positivo):

#### B) De artrosis periférica:

1. De acuerdo con el cuestionario realizado en (*decir la fecha de la entrevista hecha por el call center*), usted tiene o ha tenido dolor en (*decir la localización por el*

*cuestionario del call center*), sin que haya recibido golpe/caída o sobreesfuerzo.

¿Es así? ☐ Sí ☐ No

*Si respuesta afirmativa a la pregunta 1, continuar preguntando:*

2. ¿Le ha durado el dolor más de 4 semanas seguidas? ☐ Sí ☐ No

*Si respuesta afirmativa a la pregunta 2, continuar preguntando:*

3. Localización:

Mano ☐ Sí ☐ No

Lateralidad ☐ Ambas ☐ Derecha ☐ Izquierda

Cadera ☐ Sí ☐ No

Lateralidad ☐ Ambas ☐ Derecha ☐ Izquierda

Rodilla ☐ Sí ☐ No

Lateralidad ☐ Ambas ☐ Derecha ☐ Izquierda

Tobillo ☐ Sí ☐ No

Lateralidad ☐ Ambas ☐ Derecha ☐ Izquierda

Pie ☐ Sí ☐ No

Lateralidad ☐ Ambas ☐ Derecha ☐ Izquierda

4. ¿Ha tendido inflamación/hinchazón de forma mantenida en (*decir la localización afectada*) más de 4 semanas? ☐ Sí ☐ No

5. El dolor de cadera/ingle, ¿empeora con el esfuerzo, al caminar o subir/bajar escaleras? ☐ Sí ☐ No

o

6. ¿mejora con la actividad física/el ejercicio? ☐ Sí ☐ No

7. ¿Mejora el dolor de cadera/ingle con el reposo? ☐ Sí ☐ No

8. El dolor de rodilla(s), ¿empeora con el esfuerzo, al caminar o subir/bajar escaleras?

☐ Sí ☐ No

o

9. ¿mejora con la actividad física/el ejercicio? ☐ Sí ☐ No
10. ¿Mejora el dolor de rodilla(s) con el reposo? ☐ Sí ☐ No
11. El dolor de tobillo, ¿empeora con el esfuerzo, al caminar o subir/bajar escaleras?
- ☐ Sí ☐ No

o

12. ¿mejora con la actividad física/el ejercicio? ☐ Sí ☐ No
13. ¿Mejora el dolor de tobillo con el reposo? ☐ Sí ☐ No
14. El dolor de pie, ¿empeora con el esfuerzo, al caminar o subir/bajar escaleras?
- ☐ Sí ☐ No

o

15. ¿mejora con la actividad física/el ejercicio? ☐ Sí ☐ No
16. ¿Mejora el dolor de pie con el reposo? ☐ Sí ☐ No
17. El dolor de mano(s), ¿empeora al usar las manos/mover los dedos? ☐ Sí ☐ No

o

18. ¿mejora al usar las manos/mover los dedos? ☐ Sí ☐ No
19. ¿Mejora el dolor de mano(s) con el reposo? ☐ Sí ☐ No
20. ¿Le ocurre que por la mañana no puede mover la zona(s) afectada(s) o la(s) encuentra rígida(s)? ☐ Sí ☐ No

*Si respuesta afirmativa a la pregunta 20, preguntar:*

21. ¿Durante más de media hora? ☐ Sí ☐ No

*Sí respuesta afirmativa a la pregunta 5, 8 o 17, responder a las preguntas 22 a 27 según corresponda por la localización:*

22. ¿Le han hecho una radiografía para estudiar el dolor de cadera(s)/ingle(s)? ☐ Sí ☐ No
23. ¿Recuerda el resultado? ☐ Normal ☐ Con alteraciones ☐ No recuerda

24. ¿Le han hecho una radiografía para estudiar el dolor de rodilla(s)?

☐ Sí ☐ No

25. ¿Recuerda el resultado? ☐ Normal ☐ Con alteraciones ☐ No recuerda

26. ¿Le han hecho una radiografía para estudiar dolor de mano(s)? ☐ Sí ☐ No

27. ¿Recuerda el resultado? ☐ Normal ☐ Con alteraciones ☐ No recuerda

*Teniendo en cuenta las respuestas anteriores:*

28. Resultado cribado artrosis<sup>1</sup> ☐ Positivo ☐ Negativo

29. ¿Mantiene usted la sospecha de artrosis? ☐ Sí ☐ No

30. Motivo de la sospecha negativa de artrosis (indicar en caso de que se decida no mantener la sospecha cuando el resultado del cribado de acuerdo a los criterios definidos por el comité científico es positivo):

<sup>1</sup> De acuerdo con los criterios definidos por el comité científico: Se mantendrá la sospecha si el individuo refiere dolor de las características descritas y no refiere un resultado normal en la radiografía o no se la han realizado.
